# Supplementary material for: Induced hydrophobic recovery of oxygen plasma-treated surfaces
Source: Royal Society of Chemistry journal article supplement (doi:10.1039/c2lc21052e), 2012-01-01
Supplement: c2lc21052e.pdf [file c2lc21052e.pdf]

## **Electronic Supplemental Information:**

### **Induced hydrophobic recovery of oxygen plasma-treated surfaces**

David J. Guckenberger<sup>a</sup>, Erwin Berthier<sup>b,\*</sup>, Edmond W.K. Young<sup>a,\*</sup>, David J. Beebe<sup>a,§</sup>

<sup>a</sup>*Department of Biomedical Engineering, Wisconsin Institutes for Medical Research, University of Wisconsin-Madison, 1111 Highland Ave, Madison, WI, USA.*

<sup>b</sup>*Department of Medical Microbiology, University of Wisconsin-Madison*

\* Contributed equally

§ Correspondence should be addressed to D.J. Beebe ([djbeebe@wisc.edu](mailto:djbeebe@wisc.edu))

#### **Corresponding Author:**

David J. Beebe

Wisconsin Institutes for Medical Research

Department of Biomedical Engineering

University of Wisconsin - Madison

1111 Highland Ave, room 6009

Madison, WI, USA 53705

[Tel:+1-608-262-2260](tel:+16082622260)

Email: [djbeebe@wisc.edu](mailto:djbeebe@wisc.edu)

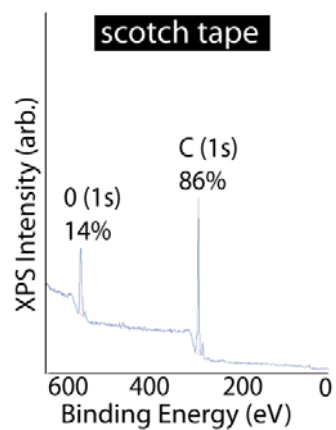

Fig E1. XPS data for scotch tape

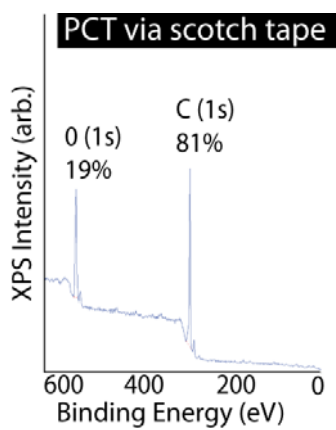

Fig E2. XPS data of PS after PCT via scotch tape
